# Supplementary material for: Research on the Promotion of Sludge Anaerobic Fermentation with Sodium Citrate under Low Concentrations of Polyaluminum Chloride
Source: MDPI journal article supplement (doi:10.3390/fermentation9080776), 2023-08-21
Supplement: s1 [file s1]

Table S1. Raw data-SCFAs

| Time | Sample | 2.0005 | 0.0037x+1.2844 | 3.2222 | 0.0037x+1.9452 | SCFAs     |
|------|--------|--------|----------------|--------|----------------|-----------|
|      |        |        | acetic acid    |        | propionic acid |           |
| day1 | T1     | 118032 | 438.0028       | 48243  | 180.4443       | 618.4471  |
|      | T2     | 103418 | 383.931        | 39718  | 148.9018       | 532.8328  |
|      | T3     | 128119 | 475.3247       | 49533  | 185.2173       | 660.542   |
|      | T4     | 250030 | 926.3954       | 53955  | 201.5787       | 1127.9741 |
|      | T5     | 396440 | 1468.1124      | 90004  | 334.96         | 1803.0724 |
|      | T6     | 450349 | 1667.5757      | 102820 | 382.3792       | 2049.9549 |
| day2 | T1     | 127594 | 473.3822       | 143803 | 534.0163       | 1007.3985 |
|      | T2     | 129830 | 481.6554       | 78955  | 294.0787       | 775.7341  |
|      | T3     | 145828 | 540.848        | 149809 | 556.2385       | 1097.0865 |
|      | T4     | 274796 | 1018.0296      | 141899 | 526.9715       | 1545.0011 |
|      | T5     | 386894 | 1432.7922      | 138525 | 514.4877       | 1947.2799 |
|      | T6     | 451647 | 1672.3783      | 169293 | 628.3293       | 2300.7076 |
| day3 | T1     | 230860 | 855.4664       | 83897  | 312.3641       | 1167.8305 |
|      | T2     | 180640 | 669.6524       | 77188  | 287.5408       | 957.1932  |
|      | T3     | 245203 | 908.5355       | 86593  | 322.3393       | 1230.8748 |
|      | T4     | 399528 | 1479.538       | 99353  | 369.5513       | 1849.0893 |
|      | T5     | 484783 | 1794.9815      | 109476 | 407.0064       | 2201.9879 |
|      | T6     | 575931 | 2132.2291      | 117995 | 438.5267       | 2570.7558 |
| day4 | T1     | 274993 | 1018.7585      | 90975  | 338.5527       | 1357.3112 |
|      | T2     | 195379 | 724.1867       | 75578  | 281.5838       | 1005.7705 |
|      | T3     | 308750 | 1143.6594      | 92625  | 344.6577       | 1488.3171 |
|      | T4     | 463951 | 1717.9031      | 153947 | 571.5491       | 2289.4522 |
|      | T5     | 579478 | 2145.353       | 201055 | 745.8487       | 2891.2017 |
|      | T6     | 602915 | 2232.0699      | 218059 | 808.7635       | 3040.8334 |

|      |    |        |           |        |           |           |
|------|----|--------|-----------|--------|-----------|-----------|
| day5 | T1 | 322205 | 1193.4429 | 86449  | 321.8065  | 1515.2494 |
|      | T2 | 230764 | 855.1112  | 82987  | 308.9971  | 1164.1083 |
|      | T3 | 361679 | 1339.4967 | 88081  | 327.8449  | 1667.3416 |
|      | T4 | 394682 | 1461.6078 | 90103  | 335.3263  | 1796.9341 |
|      | T5 | 423224 | 1567.2132 | 116772 | 434.0016  | 2001.2148 |
|      | T6 | 612257 | 2266.6353 | 259531 | 962.2099  | 3228.8452 |
| day6 | T1 | 189934 | 704.0402  | 70401  | 262.4289  | 966.4691  |
|      | T2 | 133250 | 494.3094  | 63943  | 238.5343  | 732.8437  |
|      | T3 | 199068 | 737.836   | 71997  | 268.3341  | 1006.1701 |
|      | T4 | 273859 | 1014.5627 | 96818  | 360.1718  | 1374.7345 |
|      | T5 | 292787 | 1084.5963 | 218160 | 809.1372  | 1893.7335 |
|      | T6 | 501782 | 1857.8778 | 414978 | 1537.3638 | 3395.2416 |
| day7 | T1 | 16616  | 62.7636   | 102990 | 383.0082  | 445.7718  |
|      | T2 | 10288  | 39.35     | 75235  | 280.3147  | 319.6647  |
|      | T3 | 25652  | 96.1968   | 145526 | 540.3914  | 636.5882  |
|      | T4 | 46926  | 174.9106  | 273755 | 1014.8387 | 1189.7493 |
|      | T5 | 105991 | 393.4511  | 327316 | 1213.0144 | 1606.4655 |
|      | T6 | 250107 | 926.6803  | 705123 | 2610.9003 | 3537.5806 |
